# Supplementary material for: Iron overload by Superparamagnetic Iron Oxide Nanoparticles is a High Risk Factor in Cirrhosis by a Systems Toxicology Assessment
Source: PubMed Central journal article supplement (PMC4928111; doi:10.1038/srep29110), 2016-06-30
Supplement: srep29110-s1.pdf [file srep29110-s1.pdf]

# Iron overload by Superparamagnetic Iron Oxide Nanoparticles is a High Risk Factor in Cirrhosis by a Systems Toxicology Assessment

Yushuang Wei<sup>†</sup>, Mengzhu Zhao<sup>†</sup>, Fang Yang<sup>†</sup>, Yang Mao<sup>†</sup>, Hang Xie<sup>‡</sup>, Qibing Zhou<sup>†,\*</sup>

<sup>†</sup>Department of Nanomedicine & Biopharmaceuticals, National Engineering Research Center for Nanomedicine, Huazhong University of Science and Technology, Wuhan, Hubei, China

<sup>‡</sup>Division of Viral Products, Office of Vaccines Research and Review, Center for Biologics Evaluation and Research, United States Food and Drug Administration, Silver Spring, Maryland, United States of America

## Supplementary Materials

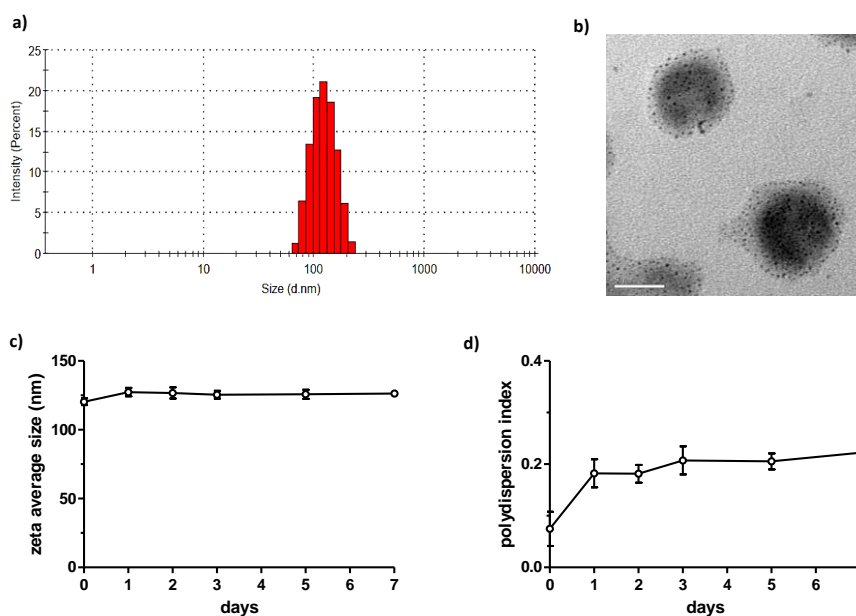

**Figure S1.** Physiological properties of SPIONs and their stability over time. a) the size distribution of SPIONs in water as measured by dynamic light scattering; b) TEM image of synthesized SPIONs (the scale bar at the bottom was 50 nm); c) and d) the stability of SPIONs at 37 °C over 7 days in the PBS solution containing 10% fetal bovine serum; the data in the graphs were presented as the average of the triplicated measurements with the standard deviation as the error bar.

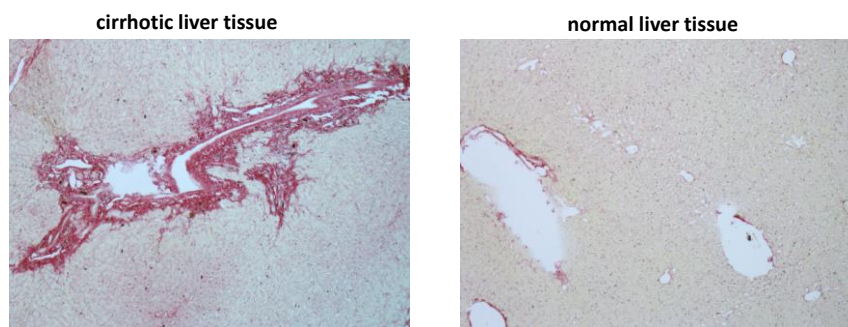

**Figure S2.** Pathology analysis of the liver tissues by Sirius red staining in the cirrhosis model as compared to the normal one. The liver tissues were obtained in week six post oral gavage of a suspension of DDC in corn oil for four weeks. The scar tissue was stained positively as the dark red color as shown in the left top panel.

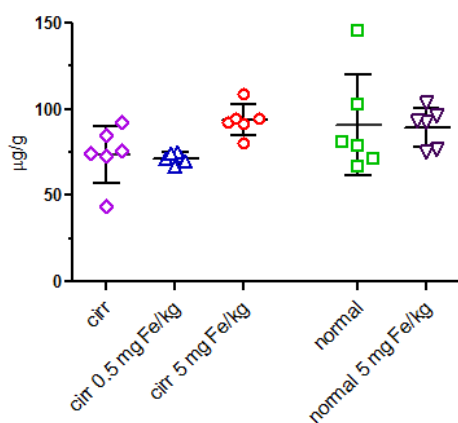

**Figure S3.** Iron level of the liver tissues in the cirrhosis and normal groups on day 14 post the SPION injection. Cirr: cirrhosis group without SPION injection; cirr 0.5 mg Fe/kg: cirrhosis group with SPION injection at 0.5 mg Fe/kg; cirr 5mg Fe/kg: cirrhosis group with SPION injection at 5 mg Fe/kg; normal: normal group without SPION injection; normal 5 mg Fe/kg: normal group with SPION injection at 0.5 mg Fe/kg. Each subgroup had six mice and statistical analysis indicated there was no significant difference.

Supplementary Table S1. Regulation of gene expression of the molecular toxicity pathways in the liver tissues by more than 2-folds changes at 24 h post SPION injection (5 mg Fe/kg).<sup>1</sup>

| gene symbol | Description                                                                           | normal liver        | cirrhotic liver     | pathways involved                                                     |
|-------------|---------------------------------------------------------------------------------------|---------------------|---------------------|-----------------------------------------------------------------------|
| Cd4         | CD4 antigen                                                                           | -12.75 <sup>A</sup> | —*                  | Immunotoxicity                                                        |
| Cd19        | CD19 antigen                                                                          | -4.27 <sup>B</sup>  | -2.44 <sup>A</sup>  | Immunotoxicity                                                        |
| Csf2        | Colony stimulating factor 2 (granulocyte-macrophage)                                  | —                   | 13.81               | Immunotoxicity                                                        |
| Cyp4a14     | Cytochrome P450 4a14                                                                  | —                   | 3.36                | Immunotoxicity                                                        |
| Ifng        | Interferon gamma                                                                      | -2.28 <sup>B</sup>  | —                   | Immunotoxicity                                                        |
| Il2         | Interleukin 2                                                                         | —                   | 11.43 <sup>B</sup>  | Immunotoxicity, Cholestasis                                           |
| Il2ra       | Interleukin 2 receptor, alpha chain                                                   | 3.89                | -2.44               | Immunotoxicity                                                        |
| Il4         | Interleukin 4                                                                         | —                   | 12.52 <sup>A</sup>  | Immunotoxicity                                                        |
| Il5         | Interleukin 5                                                                         | —                   | 6.29 <sup>B</sup>   | Immunotoxicity                                                        |
| Il6         | Interleukin 6                                                                         | -2.37 <sup>B</sup>  | -22.72 <sup>B</sup> | Immunotoxicity, Cholestasis                                           |
| Il10        | Interleukin 10                                                                        | -7.47 <sup>B</sup>  | —                   | Immunotoxicity, Cholestasis                                           |
| Klf1        | Kruppel-like factor 1 (erythroid)                                                     | —                   | 3.18 <sup>A</sup>   | Immunotoxicity                                                        |
| Pon1        | Paraoxonase 1                                                                         | —                   | 2.77                | Immunotoxicity                                                        |
| Pou3f3      | POU domain, class 3, transcription factor 3                                           | -94008 <sup>A</sup> | 2.27 <sup>A</sup>   | Immunotoxicity                                                        |
| Aass        | Aminoacidipate-semialdehyde synthase                                                  | -164.22             | —                   | Oxidative Stress & Response                                           |
| Duox2       | Dual oxidase 2                                                                        | —                   | -4.66 <sup>A</sup>  | Oxidative Stress & Response                                           |
| Epx         | Eosinophil peroxidase                                                                 | 2.05 <sup>B</sup>   | 2.17 <sup>B</sup>   | Oxidative Stress & Response                                           |
| Gpx5        | Glutathione peroxidase 5                                                              | -3.98 <sup>A</sup>  | 2.57 <sup>A</sup>   | Oxidative Stress & Response                                           |
| Gpx6        | Glutathione peroxidase 6                                                              | -2.50               | 3.88                | Oxidative Stress & Response                                           |
| Tpo         | Thyroid peroxidase                                                                    | 2.47 <sup>B</sup>   | 2.09 <sup>B</sup>   | Oxidative Stress & Response                                           |
| Txnip       | Thioredoxin interacting protein                                                       | -2.52               | —                   | Oxidative Stress & Response                                           |
| Ucp3        | Uncoupling protein 3 (mitochondrial, proton carrier)                                  | -3.36 <sup>B</sup>  | 4.12 <sup>B</sup>   | Oxidative Stress & Response, Mitochondria Energy Metabolism           |
| Aco2        | Aconitase 2, mitochondrial                                                            | —                   | 5.49                | Mitochondria Energy Metabolism                                        |
| Cox7a2      | Cytochrome c oxidase, subunit VIIa 2                                                  | —                   | 4.53 <sup>A</sup>   | Mitochondria Energy Metabolism                                        |
| Ogdh1       | Oxoglutarate dehydrogenase-like                                                       | 14.94 <sup>B</sup>  | —                   | Mitochondria Energy Metabolism                                        |
| Suclg1      | Succinate-CoA ligase, GDP-forming, alpha subunit                                      | 8.01                | -498.17             | Mitochondria Energy Metabolism                                        |
| Atm         | Ataxia telangiectasia mutated homolog (human)                                         | -11.44 <sup>A</sup> | —                   | DNA Damage & Repair                                                   |
| Cdkn1a      | Cyclin-dependent kinase inhibitor 1A (P21)                                            | 6.16                | —                   | DNA Damage & Repair                                                   |
| Chek2       | CHK2 checkpoint homolog ( <i>S. pombe</i> )                                           | —                   | 2.12                | DNA Damage & Repair                                                   |
| Ercc3       | Excision repair cross-complementing rodent repair deficiency, complementation group 3 | -2.90               | —                   | DNA Damage & Repair                                                   |
| Gadd45a     | Growth arrest and DNA-damage-inducible 45 alpha                                       | -6.49               | —                   | DNA Damage & Repair, Apoptosis, ER Stress & Unfolded Protein Response |
| Casp8       | Caspase 8                                                                             | -110.32             | —                   | Apoptosis                                                             |
| Cd40        | CD40 antigen                                                                          | -2.61 <sup>A</sup>  | —                   | Apoptosis                                                             |
| Cd40lg      | CD40 ligand                                                                           | -4.18 <sup>A</sup>  | —                   | Apoptosis                                                             |
| Cflar       | CASP8 and FADD-like apoptosis regulator                                               | -2.01               | —                   | Apoptosis                                                             |
| Fas1        | Fas ligand (TNF superfamily, member 6)                                                | —                   | 4.25                | Apoptosis                                                             |
| Tnfrsf10b   | Tumor necrosis factor receptor superfamily, member 10b                                | -2.49               | —                   | Apoptosis                                                             |
| Atp6v1g2    | ATPase, H+ transporting, lysosomal V1 subunit G2                                      | -11.90 <sup>A</sup> | 2.79                | Necrosis                                                              |
| Defb1       | Defensin beta 1                                                                       | —                   | -2.23               | Necrosis                                                              |
| Dpysl4      | Dihydropyrimidinase-like 4                                                            | 5.99 <sup>B</sup>   | —                   | Necrosis                                                              |
| Gaint5      | UDP-N-acetyl-alpha-D-galactosamine:polypeptide N-acetylgalactosaminyltransferase 5    | —                   | 7.71 <sup>B</sup>   | Necrosis                                                              |
| Jph3        | Junctophilin 3                                                                        | -2.38 <sup>B</sup>  | 40.77 <sup>A</sup>  | Necrosis                                                              |
| Olf1404     | Olfactory receptor 1404                                                               | —                   | 6.43 <sup>B</sup>   | Necrosis                                                              |
| S100a7a     | S100 calcium binding protein A7A                                                      | -5.81 <sup>B</sup>  | —                   | Necrosis                                                              |
| Cyp1a1      | Cytochrome P450 1a1                                                                   | 2.09                | —                   | CYP450s & Drug Metabolism, Immunotoxicity                             |
| Cyp1a2      | Cytochrome P450 1a2                                                                   | —                   | 2.33                | CYP450s & Drug Metabolism                                             |
| Cyp2e1      | Cytochrome P450 2e1                                                                   | —                   | 2.20                | CYP450s & Drug Metabolism, Steatosis                                  |
| Fmo3        | Flavin containing monooxygenase 3                                                     | -2.01               | 4.67                | CYP450s & Drug Metabolism                                             |

|         |                                                                            |                     |                    |                                       |
|---------|----------------------------------------------------------------------------|---------------------|--------------------|---------------------------------------|
| Acot2   | Acyl-CoA thioesterase 2                                                    | -12.48 <sup>A</sup> | 8.33               | Fatty Acid Metabolism                 |
| Acot3   | Acyl-CoA thioesterase 3                                                    | -2.72               | 2.78               | Fatty Acid Metabolism                 |
| Acot7   | Acyl-CoA thioesterase 7                                                    | -2.67               | –                  | Fatty Acid Metabolism                 |
| Acot8   | Acyl-CoA thioesterase 8                                                    | -104.98             | –                  | Fatty Acid Metabolism                 |
| Acot9   | Acyl-CoA thioesterase 9                                                    | -38.51 <sup>A</sup> | –                  | Fatty Acid Metabolism                 |
| Acot12  | Acyl-CoA thioesterase 12                                                   | -2.09               | –                  | Fatty Acid Metabolism                 |
| Acox2   | Acyl-Coenzyme A oxidase 2, branched chain                                  | -2.64               | –                  | Fatty Acid Metabolism                 |
| Echs1   | Enoyl Coenzyme A hydratase, short chain, 1, mitochondrial                  | 204.58              | –                  | Fatty Acid Metabolism                 |
| Ces2c   | Carboxylesterase 2C                                                        | –                   | 2.50               | Phospholipidosis                      |
| Inhb    | Inhibin beta E                                                             | -2.87               | -2.24              | Phospholipidosis                      |
| Sc4mol  | Sterol-C4-methyl oxidase-like                                              | –                   | 3.76               | Phospholipidosis                      |
| Ugt2a1  | UDP glucuronosyltransferase 2A1                                            | -8.40 <sup>A</sup>  | 13.20 <sup>B</sup> | Phospholipidosis                      |
| Abcb1a  | ATP-binding cassette, B1A (MDR/TAP)                                        | -3.01               | –                  | Cholestasis                           |
| Abcb4   | ATP-binding cassette, B4 (MDR/TAP)                                         | -202.81             | –                  | Cholestasis                           |
| Abcc1   | ATP-binding cassette, C1 (CFTR/MRP)                                        | -15.17 <sup>A</sup> | –                  | Cholestasis                           |
| Abcc3   | ATP-binding cassette, C3 (CFTR/MRP)                                        | -2.03               | –                  | Cholestasis                           |
| Cyp7a1  | Cytochrome P450 7a1                                                        | -2.04               | –                  | Cholestasis                           |
| Slc10a1 | Solute carrier family 10 (sodium/bile acid cotransporter family), member 1 | –                   | 2.08               | Cholestasis                           |
| Tgfb1   | Transforming growth factor, beta 1                                         | –                   | 45.18              | Cholestasis                           |
| Aqp4    | Aquaporin 4                                                                | -2.42               | –                  | Steatosis                             |
| Cd36    | CD36 antigen                                                               | –                   | 4.79               | Steatosis                             |
| Pnpla3  | Patatin-like phospholipase domain containing 3                             | 2.63                | –                  | Steatosis                             |
| Retn    | Resistin                                                                   | –                   | 47.91 <sup>A</sup> | Steatosis                             |
| Scd1    | Stearoyl-Coenzyme A desaturase 1                                           | 3.06                | –                  | Steatosis                             |
| Syt1    | Synaptotagmin I                                                            | -2.14               | –                  | Steatosis                             |
| Cryaa   | Crystallin, alpha A                                                        | -2.75 <sup>B</sup>  | –                  | Heat Shock Response                   |
| Cryab   | Crystallin, alpha B                                                        | -32.46 <sup>A</sup> | –                  | Heat Shock Response                   |
| Dnaja2  | DnaJ (Hsp40) homolog, subfamily A, member 2                                | -171.73             | –                  | Heat Shock Response                   |
| Hspa1a  | Heat shock protein 1A                                                      | 4.03                | –                  | Heat Shock Response                   |
| Hspb7   | Heat shock protein family, member 7 (cardiovascular)                       | 13.37 <sup>A</sup>  | –                  | Heat Shock Response                   |
| Atf4    | Activating transcription factor 4                                          | -68.31              | –                  | ER Stress & Unfolded Protein Response |
| Atf6    | Activating transcription factor 6                                          | -93.12              | –                  | ER Stress & Unfolded Protein Response |
| Ern2    | Endoplasmic reticulum (ER) to nucleus signalling 2                         | –                   | 40.17 <sup>A</sup> | ER Stress & Unfolded Protein Response |
| Htra4   | Htra serine peptidase 4                                                    | –                   | 2.01               | ER Stress & Unfolded Protein Response |

<sup>1</sup>Only genes from RT<sup>2</sup> PCR analysis by more than 2-folds changes were presented in the table with the red color for the upregulated and the blue for the downregulated. The folds of upregulated were calculated as the levels of expression in the SPION group over those of the control group without SPION injection whereas the downregulated ones were the negative inverse of the levels of expression in the SPION group over those of the control group.

\*The change of expression was less than 2-folds.

<sup>A</sup>The gene expression level was reasonably detected in one group yet relatively low in the other group (Ct>30), possibly due to the variations between the samples.

<sup>B</sup>The gene expression levels were low in the both groups (Ct>30), thus the folds of changes could be false positive, possibly due to large variations between the samples.

**Table S2.** Symbols and description of the 370 genes determined in the 384-well molecular toxicology pathwayfinder array (PAMM-3401Z, Qiagen).

| No | Symbol        | Description                                                                       | Refseq    |
|----|---------------|-----------------------------------------------------------------------------------|-----------|
| 1  | 9430015G10Rik | RIKEN cDNA 9430015G10 gene                                                        | NM_145557 |
| 2  | Aass          | Aminoadipate-semialdehyde synthase                                                | NM_013930 |
| 3  | Abcb1a        | ATP-binding cassette, sub-family B (MDR/TAP), member 1A                           | NM_011076 |
| 4  | Abcb1b        | ATP-binding cassette, sub-family B (MDR/TAP), member 1B                           | NM_011075 |
| 5  | Abcb4         | ATP-binding cassette, sub-family B (MDR/TAP), member 4                            | NM_008830 |
| 6  | Abcc1         | ATP-binding cassette, sub-family C (CFTR/MRP), member 1                           | NM_008576 |
| 7  | Abcc2         | ATP-binding cassette, sub-family C (CFTR/MRP), member 2                           | NM_013806 |
| 8  | Abcc3         | ATP-binding cassette, sub-family C (CFTR/MRP), member 3                           | NM_029600 |
| 9  | Abl1          | C-abl oncogene 1, non-receptor tyrosine kinase                                    | NM_009594 |
| 10 | Acaa1a        | Acetyl-Coenzyme A acyltransferase 1A                                              | NM_130864 |
| 11 | Acaa2         | Acetyl-Coenzyme A acyltransferase 2 (mitochondrial 3-oxoacyl-Coenzyme A thiolase) | NM_177470 |
| 12 | Acaca         | Acetyl-Coenzyme A carboxylase alpha                                               | NM_133360 |
| 13 | Acad11        | Acyl-Coenzyme A dehydrogenase family, member 11                                   | NM_175324 |
| 14 | Acad9         | Acyl-Coenzyme A dehydrogenase family, member 9                                    | NM_172678 |
| 15 | Acadl         | Acyl-Coenzyme A dehydrogenase, long-chain                                         | NM_007381 |
| 16 | Acadm         | Acyl-Coenzyme A dehydrogenase, medium chain                                       | NM_007382 |
| 17 | Acads         | Acyl-Coenzyme A dehydrogenase, short chain                                        | NM_007383 |
| 18 | Acadsb        | Acyl-Coenzyme A dehydrogenase, short/branched chain                               | NM_025826 |
| 19 | Acadvl        | Acyl-Coenzyme A dehydrogenase, very long chain                                    | NM_017366 |
| 20 | Acat1         | Acetyl-Coenzyme A acetyltransferase 1                                             | NM_144784 |
| 21 | Acat2         | Acetyl-Coenzyme A acetyltransferase 2                                             | NM_009338 |
| 22 | Acly          | ATP citrate lyase                                                                 | NM_134037 |
| 23 | Aco1          | Aconitase 1                                                                       | NM_007386 |
| 24 | Aco2          | Aconitase 2, mitochondrial                                                        | NM_080633 |
| 25 | Acot12        | Acyl-CoA thioesterase 12                                                          | NM_028790 |
| 26 | Acot2         | Acyl-CoA thioesterase 2                                                           | NM_134188 |
| 27 | Acot3         | Acyl-CoA thioesterase 3                                                           | NM_134246 |
| 28 | Acot6         | Acyl-CoA thioesterase 6                                                           | NM_172580 |
| 29 | Acot7         | Acyl-CoA thioesterase 7                                                           | NM_133348 |
| 30 | Acot8         | Acyl-CoA thioesterase 8                                                           | NM_133240 |
| 31 | Acot9         | Acyl-CoA thioesterase 9                                                           | NM_019736 |
| 32 | Acox1         | Acyl-Coenzyme A oxidase 1, palmitoyl                                              | NM_015729 |
| 33 | Acox2         | Acyl-Coenzyme A oxidase 2, branched chain                                         | NM_053115 |
| 34 | Acox3         | Acyl-Coenzyme A oxidase 3, pristanoyl                                             | NM_030721 |
| 35 | Adh1          | Alcohol dehydrogenase 1 (class I)                                                 | NM_007409 |
| 36 | Adk           | Adenosine kinase                                                                  | NM_134079 |
| 37 | Ahr           | Aryl-hydrocarbon receptor                                                         | NM_013464 |
| 38 | Ahsg          | Alpha-2-HS-glycoprotein                                                           | NM_013465 |
| 39 | Akt1          | Thymoma viral proto-oncogene 1                                                    | NM_009652 |
| 40 | Alb           | Albumin                                                                           | NM_009654 |
| 41 | Aldh1a1       | Aldehyde dehydrogenase family 1, subfamily A1                                     | NM_013467 |
| 42 | Aldh2         | Aldehyde dehydrogenase 2, mitochondrial                                           | NM_009656 |
| 43 | Amfr          | Autocrine motility factor receptor                                                | NM_011787 |
| 44 | Apaf1         | Apoptotic peptidase activating factor 1                                           | NM_009684 |

|    |          |                                                              |              |
|----|----------|--------------------------------------------------------------|--------------|
| 45 | Apex1    | Apurinic/apurimidinic endonuclease 1                         | NM_009687    |
| 46 | Apoa5    | Apolipoprotein A-V                                           | NM_080434    |
| 47 | Apoe     | Apolipoprotein E                                             | NM_009696    |
| 48 | Apof     | Apolipoprotein F                                             | NM_133997    |
| 49 | Aqp4     | Aquaporin 4                                                  | NM_009700    |
| 50 | Asah1    | N-acylsphingosine amidohydrolase 1                           | NM_019734    |
| 51 | Asns     | Asparagine synthetase                                        | NM_012055    |
| 52 | Atf4     | Activating transcription factor 4                            | NM_009716    |
| 53 | Atf6     | Activating transcription factor 6                            | NM_001081304 |
| 54 | Atm      | Ataxia telangiectasia mutated homolog (human)                | NM_007499    |
| 55 | Atp6v1g2 | ATPase, H <sup>+</sup> transporting, lysosomal V1 subunit G2 | NM_023179    |
| 56 | Atp8b1   | ATPase, class I, type 8B, member 1                           | NM_001001488 |
| 57 | Bad      | BCL2-associated agonist of cell death                        | NM_007522    |
| 58 | Bak1     | BCL2-antagonist/killer 1                                     | NM_007523    |
| 59 | Bax      | Bcl2-associated X protein                                    | NM_007527    |
| 60 | Bcl2     | B-cell leukemia/lymphoma 2                                   | NM_009741    |
| 61 | Bcl2l1   | Bcl2-like 1                                                  | NM_009743    |
| 62 | Bcl2l11  | BCL2-like 11 (apoptosis facilitator)                         | NM_009754    |
| 63 | Bid      | BH3 interacting domain death agonist                         | NM_007544    |
| 64 | Birc3    | Baculoviral IAP repeat-containing 3                          | NM_007464    |
| 65 | Bmf      | Bcl2 modifying factor                                        | NM_138313    |
| 66 | Brca1    | Breast cancer 1                                              | NM_009764    |
| 67 | Brca2    | Breast cancer 2                                              | NM_009765    |
| 68 | C3       | Complement component 3                                       | NM_009778    |
| 69 | C9       | Complement component 9                                       | NM_013485    |
| 70 | Casp1    | Caspase 1                                                    | NM_009807    |
| 71 | Casp2    | Caspase 2                                                    | NM_007610    |
| 72 | Casp3    | Caspase 3                                                    | NM_009810    |
| 73 | Casp7    | Caspase 7                                                    | NM_007611    |
| 74 | Casp8    | Caspase 8                                                    | NM_009812    |
| 75 | Casp9    | Caspase 9                                                    | NM_015733    |
| 76 | Cat      | Catalase                                                     | NM_009804    |
| 77 | Cd19     | CD19 antigen                                                 | NM_009844    |
| 78 | Cd36     | CD36 antigen                                                 | NM_007643    |
| 79 | Cd4      | CD4 antigen                                                  | NM_013488    |
| 80 | Cd40     | CD40 antigen                                                 | NM_011611    |
| 81 | Cd40lg   | CD40 ligand                                                  | NM_011616    |
| 82 | Cd44     | CD44 antigen                                                 | NM_009851    |
| 83 | Cd80     | CD80 antigen                                                 | NM_009855    |
| 84 | Cd86     | CD86 antigen                                                 | NM_019388    |
| 85 | Cd8a     | CD8 antigen, alpha chain                                     | NM_001081110 |
| 86 | Cdkn1a   | Cyclin-dependent kinase inhibitor 1A (P21)                   | NM_007669    |
| 87 | Ces2c    | Carboxylesterase 2C                                          | NM_145603    |
| 88 | Cflar    | CASP8 and FADD-like apoptosis regulator                      | NM_009805    |
| 89 | Chek1    | Checkpoint kinase 1 homolog (S. pombe)                       | NM_007691    |
| 90 | Chek2    | CHK2 checkpoint homolog (S. pombe)                           | NM_016681    |
| 91 | Commd4   | COMM domain containing 4                                     | NM_025417    |
| 92 | Comt     | Catechol-O-methyltransferase                                 | NM_007744    |

|     |         |                                                                                       |              |
|-----|---------|---------------------------------------------------------------------------------------|--------------|
| 93  | Cox6b1  | Cytochrome c oxidase, subunit VIb polypeptide 1                                       | NM_025628    |
| 94  | Cox7a2  | Cytochrome c oxidase, subunit VIIa 2                                                  | NM_009945    |
| 95  | Cox8a   | Cytochrome c oxidase, subunit VIIIA                                                   | NM_007750    |
| 96  | Cpt1a   | Carnitine palmitoyltransferase 1a, liver                                              | NM_013495    |
| 97  | Cpt1b   | Carnitine palmitoyltransferase 1b, muscle                                             | NM_009948    |
| 98  | Cpt2    | Carnitine palmitoyltransferase 2                                                      | NM_009949    |
| 99  | Crat    | Carnitine acetyltransferase                                                           | NM_007760    |
| 100 | Crot    | Carnitine O-octanoyltransferase                                                       | NM_023733    |
| 101 | Cryaa   | Crystallin, alpha A                                                                   | NM_013501    |
| 102 | Cryab   | Crystallin, alpha B                                                                   | NM_009964    |
| 103 | Cs      | Citrate synthase                                                                      | NM_026444    |
| 104 | Csf2    | Colony stimulating factor 2 (granulocyte-macrophage)                                  | NM_009969    |
| 105 | Ctsb    | Cathepsin B                                                                           | NM_007798    |
| 106 | Ctse    | Cathepsin E                                                                           | NM_007799    |
| 107 | Cyc1    | Cytochrome c-1                                                                        | NM_025567    |
| 108 | Cyld    | Cylindromatosis (turban tumor syndrome)                                               | NM_173369    |
| 109 | Cyp1a1  | Cytochrome P450, family 1, subfamily a, polypeptide 1                                 | NM_009992    |
| 110 | Cyp1a2  | Cytochrome P450, family 1, subfamily a, polypeptide 2                                 | NM_009993    |
| 111 | Cyp2d22 | Cytochrome P450, family 2, subfamily d, polypeptide 22                                | NM_019823    |
| 112 | Cyp2e1  | Cytochrome P450, family 2, subfamily e, polypeptide 1                                 | NM_021282    |
| 113 | Cyp3a11 | Cytochrome P450, family 3, subfamily a, polypeptide 11                                | NM_007818    |
| 114 | Cyp4a14 | Cytochrome P450, family 4, subfamily a, polypeptide 14                                | NM_007822    |
| 115 | Cyp7a1  | Cytochrome P450, family 7, subfamily a, polypeptide 1                                 | NM_007824    |
| 116 | Cyp7b1  | Cytochrome P450, family 7, subfamily b, polypeptide 1                                 | NM_007825    |
| 117 | Ddit3   | DNA-damage inducible transcript 3                                                     | NM_007837    |
| 118 | Defb1   | Defensin beta 1                                                                       | NM_007843    |
| 119 | Der1    | Der1-like domain family, member 1                                                     | NM_024207    |
| 120 | Dhcr24  | 24-dehydrocholesterol reductase                                                       | NM_053272    |
| 121 | Dlat    | Dihydrolipoamide S-acetyltransferase (E2 component of pyruvate dehydrogenase complex) | NM_145614    |
| 122 | Dld     | Dihydrolipoamide dehydrogenase                                                        | NM_007861    |
| 123 | Dlst    | Dihydrolipoamide S-succinyltransferase (E2 component of 2-oxo-glutarate complex)      | NM_030225    |
| 124 | Dnaja1  | DnaJ (Hsp40) homolog, subfamily A, member 1                                           | NM_008298    |
| 125 | Dnaja2  | DnaJ (Hsp40) homolog, subfamily A, member 2                                           | NM_019794    |
| 126 | Dnaja3  | DnaJ (Hsp40) homolog, subfamily A, member 3                                           | NM_023646    |
| 127 | Dnajb1  | DnaJ (Hsp40) homolog, subfamily B, member 1                                           | NM_018808    |
| 128 | Dnajb6  | DnaJ (Hsp40) homolog, subfamily B, member 6                                           | NM_011847    |
| 129 | Dnajc3  | DnaJ (Hsp40) homolog, subfamily C, member 3                                           | NM_008929    |
| 130 | Dnajc5  | DnaJ (Hsp40) homolog, subfamily C, member 5                                           | NM_016775    |
| 131 | Dnajc6  | DnaJ (Hsp40) homolog, subfamily C, member 6                                           | NM_198412    |
| 132 | Dnm1    | Dynamin 1                                                                             | NM_010065    |
| 133 | Dpysl4  | Dihydropyrimidinase-like 4                                                            | NM_011993    |
| 134 | Duox1   | Dual oxidase 1                                                                        | NM_001099297 |
| 135 | Duox2   | Dual oxidase 2                                                                        | NM_177610    |
| 136 | Echs1   | Enoyl Coenzyme A hydratase, short chain, 1, mitochondrial                             | NM_053119    |
| 137 | Edem1   | ER degradation enhancer, mannosidase alpha-like 1                                     | NM_138677    |
| 138 | Edem3   | ER degradation enhancer, mannosidase alpha-like 3                                     | NM_001039644 |
| 139 | Ehhadh  | Enoyl-Coenzyme A, hydratase/3-hydroxyacyl Coenzyme A dehydrogenase                    | NM_023737    |
| 140 | Eif2ak3 | Eukaryotic translation initiation factor 2 alpha kinase 3                             | NM_010121    |

|     |         |                                                                                       |              |
|-----|---------|---------------------------------------------------------------------------------------|--------------|
| 141 | Eif5b   | Eukaryotic translation initiation factor 5B                                           | NM_198303    |
| 142 | Eno1    | Enolase 1, alpha non-neuron                                                           | NM_023119    |
| 143 | Ep300   | E1A binding protein p300                                                              | NM_177821    |
| 144 | Ephx1   | Epoxide hydrolase 1, microsomal                                                       | NM_010145    |
| 145 | Epx     | Eosinophil peroxidase                                                                 | NM_007946    |
| 146 | Ercc1   | Excision repair cross-complementing rodent repair deficiency, complementation group 1 | NM_007948    |
| 147 | Ercc2   | Excision repair cross-complementing rodent repair deficiency, complementation group 2 | NM_007949    |
| 148 | Ercc3   | Excision repair cross-complementing rodent repair deficiency, complementation group 3 | NM_133658    |
| 149 | Ercc5   | Excision repair cross-complementing rodent repair deficiency, complementation group 5 | NM_011729    |
| 150 | Ercc6   | Excision repair cross-complementing rodent repair deficiency, complementation group 6 | NM_001081221 |
| 151 | Ern2    | Endoplasmic reticulum (ER) to nucleus signalling 2                                    | NM_012016    |
| 152 | Ero1l   | ERO1-like (S. cerevisiae)                                                             | NM_015774    |
| 153 | Ero1lb  | ERO1-like beta (S. cerevisiae)                                                        | NM_026184    |
| 154 | Esd     | Esterase D/formylglutathione hydrolase                                                | NM_016903    |
| 155 | Esr1    | Estrogen receptor 1 (alpha)                                                           | NM_007956    |
| 156 | F2      | Coagulation factor II                                                                 | NM_010168    |
| 157 | Fabp1   | Fatty acid binding protein 1, liver                                                   | NM_017399    |
| 158 | Fadd    | Fas (TNFRSF6)-associated via death domain                                             | NM_010175    |
| 159 | Fas     | Fas (TNF receptor superfamily member 6)                                               | NM_007987    |
| 160 | Fasl    | Fas ligand (TNF superfamily, member 6)                                                | NM_010177    |
| 161 | Fasn    | Fatty acid synthase                                                                   | NM_007988    |
| 162 | Fbxo6   | F-box protein 6                                                                       | NM_015797    |
| 163 | Fh1     | Fumarate hydratase 1                                                                  | NM_010209    |
| 164 | Fmo2    | Flavin containing monooxygenase 2                                                     | NM_018881    |
| 165 | Fmo3    | Flavin containing monooxygenase 3                                                     | NM_008030    |
| 166 | Fmo4    | Flavin containing monooxygenase 4                                                     | NM_144878    |
| 167 | Fmo5    | Flavin containing monooxygenase 5                                                     | NM_010232    |
| 168 | Foxi1   | Forkhead box l1                                                                       | NM_023907    |
| 169 | Timm10b | Fractured callus expressed transcript 1                                               | NM_019502    |
| 170 | Gadd45a | Growth arrest and DNA-damage-inducible 45 alpha                                       | NM_007836    |
| 171 | Galnt5  | UDP-N-acetyl-alpha-D-galactosamine:polypeptide N-acetylgalactosaminyltransferase 5    | NM_172855    |
| 172 | Gcdh    | Glutaryl-Coenzyme A dehydrogenase                                                     | NM_008097    |
| 173 | Gpd1    | Glycerol-3-phosphate dehydrogenase 1 (soluble)                                        | NM_010271    |
| 174 | Gpt     | Glutamic pyruvic transaminase, soluble                                                | NM_182805    |
| 175 | Gpx1    | Glutathione peroxidase 1                                                              | NM_008160    |
| 176 | Gpx2    | Glutathione peroxidase 2                                                              | NM_030677    |
| 177 | Gpx3    | Glutathione peroxidase 3                                                              | NM_008161    |
| 178 | Gpx4    | Glutathione peroxidase 4                                                              | NM_008162    |
| 179 | Gpx5    | Glutathione peroxidase 5                                                              | NM_010343    |
| 180 | Gpx6    | Glutathione peroxidase 6                                                              | NM_145451    |
| 181 | Gpx7    | Glutathione peroxidase 7                                                              | NM_024198    |
| 182 | Grb2    | Growth factor receptor bound protein 2                                                | NM_008163    |
| 183 | Gsta3   | Glutathione S-transferase, alpha 3                                                    | NM_010356    |
| 184 | Gstm4   | Glutathione S-transferase, mu 4                                                       | NM_026764    |
| 185 | H2-Eb1  | Histocompatibility 2, class II antigen E beta                                         | NM_010382    |
| 186 | Vimp    | Histocompatibility 47                                                                 | NM_024439    |



|     |          |                                                                                                                                       |              |
|-----|----------|---------------------------------------------------------------------------------------------------------------------------------------|--------------|
| 187 | Haa0     | 3-hydroxyanthranilate 3,4-dioxygenase                                                                                                 | NM_025325    |
| 188 | Hadha    | Hydroxyacyl-Coenzyme A dehydrogenase/3-ketoacyl-Coenzyme A thiolase/enoyl-Coenzyme A hydratase (trifunctional protein), alpha subunit | NM_178878    |
| 189 | Hadhb    | Hydroxyacyl-Coenzyme A dehydrogenase/3-ketoacyl-Coenzyme A thiolase/enoyl-Coenzyme A hydratase (trifunctional protein), beta subunit  | NM_145558    |
| 190 | Herpud1  | Homocysteine-inducible, endoplasmic reticulum stress-inducible, ubiquitin-like domain member 1                                        | NM_022331    |
| 191 | Hpn      | Hepsin                                                                                                                                | NM_008281    |
| 192 | Hpx      | Hemopexin                                                                                                                             | NM_017371    |
| 193 | Hrg      | Histidine-rich glycoprotein                                                                                                           | NM_053176    |
| 194 | Hsf1     | Heat shock factor 1                                                                                                                   | NM_008296    |
| 195 | Hsf2     | Heat shock factor 2                                                                                                                   | NM_008297    |
| 196 | Hsp90aa1 | Heat shock protein 90, alpha (cytosolic), class A member 1                                                                            | NM_010480    |
| 197 | Hsp90ab1 | Heat shock protein 90 alpha (cytosolic), class B member 1                                                                             | NM_008302    |
| 198 | Hspa1a   | Heat shock protein 1A                                                                                                                 | NM_010479    |
| 199 | Hspa1l   | Heat shock protein 1-like                                                                                                             | NM_013558    |
| 200 | Hspa2    | Heat shock protein 2                                                                                                                  | NM_008301    |
| 201 | Hspa4    | Heat shock protein 4                                                                                                                  | NM_008300    |
| 202 | Hspa5    | Heat shock protein 5                                                                                                                  | NM_022310    |
| 203 | Hspa8    | Heat shock protein 8                                                                                                                  | NM_031165    |
| 204 | Hspa9    | Heat shock protein 9                                                                                                                  | NM_010481    |
| 205 | Hspb1    | Heat shock protein 1                                                                                                                  | NM_013560    |
| 206 | Hspb2    | Heat shock protein 2                                                                                                                  | NM_024441    |
| 207 | Hspb6    | Heat shock protein, alpha-crystallin-related, B6                                                                                      | NM_001012401 |
| 208 | Hspb7    | Heat shock protein family, member 7 (cardiovascular)                                                                                  | NM_013868    |
| 209 | Hspb8    | Heat shock protein 8                                                                                                                  | NM_030704    |
| 210 | Hspbap1  | Hspb associated protein 1                                                                                                             | NM_175111    |
| 211 | Hspd1    | Heat shock protein 1 (chaperonin)                                                                                                     | NM_010477    |
| 212 | Hspe1    | Heat shock protein 1 (chaperonin 10)                                                                                                  | NM_008303    |
| 213 | Hsph1    | Heat shock 105kDa/110kDa protein 1                                                                                                    | NM_013559    |
| 214 | Htra2    | HtrA serine peptidase 2                                                                                                               | NM_019752    |
| 215 | Htra4    | HtrA serine peptidase 4                                                                                                               | NM_001081187 |
| 216 | Icam1    | Intercellular adhesion molecule 1                                                                                                     | NM_010493    |
| 217 | Idh1     | Isocitrate dehydrogenase 1 (NAD+), soluble                                                                                            | NM_010497    |
| 218 | Idh2     | Isocitrate dehydrogenase 2 (NAD+), mitochondrial                                                                                      | NM_173011    |
| 219 | Idh3a    | Isocitrate dehydrogenase 3 (NAD+) alpha                                                                                               | NM_029573    |
| 220 | Idh3b    | Isocitrate dehydrogenase 3 (NAD+) beta                                                                                                | NM_130884    |
| 221 | Idh3g    | Isocitrate dehydrogenase 3 (NAD+), gamma                                                                                              | NM_008323    |
| 222 | Ihng     | Interferon gamma                                                                                                                      | NM_008337    |
| 223 | Il10     | Interleukin 10                                                                                                                        | NM_010548    |
| 224 | Il13     | Interleukin 13                                                                                                                        | NM_008355    |
| 225 | Il1a     | Interleukin 1 alpha                                                                                                                   | NM_010554    |
| 226 | Il1b     | Interleukin 1 beta                                                                                                                    | NM_008361    |
| 227 | Il2      | Interleukin 2                                                                                                                         | NM_008366    |
| 228 | Il2ra    | Interleukin 2 receptor, alpha chain                                                                                                   | NM_008367    |
| 229 | Il4      | Interleukin 4                                                                                                                         | NM_021283    |
| 230 | Il5      | Interleukin 5                                                                                                                         | NM_010558    |
| 231 | Il6      | Interleukin 6                                                                                                                         | NM_031168    |
| 232 | Inhbe    | Inhibin beta E                                                                                                                        | NM_008382    |
| 233 | Irf6     | Interferon regulatory factor 6                                                                                                        | NM_016851    |

|     |         |                                                                            |              |
|-----|---------|----------------------------------------------------------------------------|--------------|
| 234 | Itgax   | Integrin alpha X                                                           | NM_021334    |
| 235 | Jag1    | Jagged 1                                                                   | NM_013822    |
| 236 | Jph3    | Junctophilin 3                                                             | NM_020605    |
| 237 | Kcnip1  | Kv channel-interacting protein 1                                           | NM_027398    |
| 238 | Khk     | Ketohexokinase                                                             | NM_008439    |
| 239 | Klf1    | Kruppel-like factor 1 (erythroid)                                          | NM_010635    |
| 240 | Lig4    | Ligase IV, DNA, ATP-dependent                                              | NM_176953    |
| 241 | Lmna    | Lamin A                                                                    | NM_019390    |
| 242 | Lpl     | Lipoprotein lipase                                                         | NM_008509    |
| 243 | Lss     | Lanosterol synthase                                                        | NM_146006    |
| 244 | Ly6d    | Lymphocyte antigen 6 complex, locus D                                      | NM_010742    |
| 245 | Lyz2    | Lysozyme 2                                                                 | NM_017372    |
| 246 | Mag     | Myelin-associated glycoprotein                                             | NM_010758    |
| 247 | Manba   | Mannosidase, beta A, lysosomal                                             | NM_027288    |
| 248 | Maoa    | Monoamine oxidase A                                                        | NM_173740    |
| 249 | Maob    | Monoamine oxidase B                                                        | NM_172778    |
| 250 | Mapk8   | Mitogen-activated protein kinase 8                                         | NM_016700    |
| 251 | Mbtps1  | Membrane-bound transcription factor peptidase, site 1                      | NM_019709    |
| 252 | Mbtps2  | Membrane-bound transcription factor peptidase, site 2                      | NM_172307    |
| 253 | Mcl1    | Myeloid cell leukemia sequence 1                                           | NM_008562    |
| 254 | Mdh1    | Malate dehydrogenase 1, NAD (soluble)                                      | NM_008618    |
| 255 | Mdh1b   | Malate dehydrogenase 1B, NAD (soluble)                                     | NM_029696    |
| 256 | Mdh2    | Malate dehydrogenase 2, NAD (mitochondrial)                                | NM_008617    |
| 257 | Mdm2    | Transformed mouse 3T3 cell double minute 2                                 | NM_010786    |
| 258 | Metap2  | Methionine aminopeptidase 2                                                | NM_019648    |
| 259 | Mgmt    | O-6-methylguanine-DNA methyltransferase                                    | NM_008598    |
| 260 | Mki67   | Antigen identified by monoclonal antibody Ki 67                            | NM_001081117 |
| 261 | Mlh1    | MutL homolog 1 (E. coli)                                                   | NM_026810    |
| 262 | Mlx     | MAX-like protein X                                                         | NM_011550    |
| 263 | Mpo     | Myeloperoxidase                                                            | NM_010824    |
| 264 | Mrps18b | Mitochondrial ribosomal protein S18B                                       | NM_025878    |
| 265 | Msh2    | MutS homolog 2 (E. coli)                                                   | NM_008628    |
| 266 | Mttp    | Microsomal triglyceride transfer protein                                   | NM_008642    |
| 267 | Nfkb1   | Nuclear factor of kappa light polypeptide gene enhancer in B-cells 1, p105 | NM_008689    |
| 268 | Nploc4  | Nuclear protein localization 4 homolog (S. cerevisiae)                     | NM_199469    |
| 269 | Nqo1    | NAD(P)H dehydrogenase, quinone 1                                           | NM_008706    |
| 270 | Nr0b2   | Nuclear receptor subfamily 0, group B, member 2                            | NM_011850    |
| 271 | Nr1h4   | Nuclear receptor subfamily 1, group H, member 4                            | NM_009108    |
| 272 | Nr5a2   | Nuclear receptor subfamily 5, group A, member 2                            | NM_030676    |
| 273 | Nucb1   | Nucleobindin 1                                                             | NM_008749    |
| 274 | Nudt1   | Nudix (nucleoside diphosphate linked moiety X)-type motif 1                | NM_008637    |
| 275 | Nudt13  | Nudix (nucleoside diphosphate linked moiety X)-type motif 13               | NM_026341    |
| 276 | Nudt15  | Nudix (nucleoside diphosphate linked moiety X)-type motif 15               | NM_172527    |
| 277 | Nup210  | Nucleoporin 210                                                            | NM_018815    |
| 278 | Ogdhl   | Oxoglutarate dehydrogenase-like                                            | NM_001081130 |
| 279 | Ogg1    | 8-oxoguanine DNA-glycosylase 1                                             | NM_010957    |
| 280 | Olf1404 | Olfactory receptor 1404                                                    | NM_146881    |
| 281 | Os9     | Amplified in osteosarcoma                                                  | NM_177614    |

|     |           |                                                                            |              |
|-----|-----------|----------------------------------------------------------------------------|--------------|
| 282 | Slc51a    | Organic solute transporter alpha                                           | NM_145932    |
| 283 | Slc51b    | Organic solute transporter beta                                            | NM_178933    |
| 284 | Parp1     | Poly (ADP-ribose) polymerase family, member 1                              | NM_007415    |
| 285 | Parp2     | Poly (ADP-ribose) polymerase family, member 2                              | NM_009632    |
| 286 | Pcca      | Propionyl-Coenzyme A carboxylase, alpha polypeptide                        | NM_144844    |
| 287 | Pcna      | Proliferating cell nuclear antigen                                         | NM_011045    |
| 288 | Pdyn      | Prodynorphin                                                               | NM_018863    |
| 289 | Pfdn5     | Prefoldin 5                                                                | NM_027044    |
| 290 | Pnpl3     | Patatin-like phospholipase domain containing 3                             | NM_054088    |
| 291 | Pon1      | Paraoxonase 1                                                              | NM_011134    |
| 292 | Por       | P450 (cytochrome) oxidoreductase                                           | NM_008898    |
| 293 | Pou3f3    | POU domain, class 3, transcription factor 3                                | NM_008900    |
| 294 | Ppara     | Peroxisome proliferator activated receptor alpha                           | NM_011144    |
| 295 | Pparg     | Peroxisome proliferator activated receptor gamma                           | NM_011146    |
| 296 | Ppia      | Peptidylprolyl isomerase A                                                 | NM_008907    |
| 297 | Ppp1r15b  | Protein phosphatase 1, regulatory (inhibitor) subunit 15b                  | NM_133819    |
| 298 | Prdx1     | Peroxiredoxin 1                                                            | NM_011034    |
| 299 | Prdx2     | Peroxiredoxin 2                                                            | NM_011563    |
| 300 | Prdx6     | Peroxiredoxin 6                                                            | NM_007453    |
| 301 | Prkdc     | Protein kinase, DNA activated, catalytic polypeptide                       | NM_011159    |
| 302 | Ptgs2     | Prostaglandin-endoperoxide synthase 2                                      | NM_011198    |
| 303 | Ptprc     | Protein tyrosine phosphatase, receptor type, C                             | NM_011210    |
| 304 | Pvr       | Poliovirus receptor                                                        | NM_027514    |
| 305 | Rab25     | RAB25, member RAS oncogene family                                          | NM_016899    |
| 306 | Rad51     | RAD51 homolog (S. cerevisiae)                                              | NM_011234    |
| 307 | Rdx       | Radixin                                                                    | NM_009041    |
| 308 | Retn      | Resistin                                                                   | NM_022984    |
| 309 | S100a7a   | S100 calcium binding protein A7A                                           | NM_199422    |
| 310 | S100a8    | S100 calcium binding protein A8 (calgranulin A)                            | NM_013650    |
| 311 | Sc4mol    | Sterol-C4-methyl oxidase-like                                              | NM_025436    |
| 312 | Scd1      | Stearoyl-Coenzyme A desaturase 1                                           | NM_009127    |
| 313 | Sdha      | Succinate dehydrogenase complex, subunit A, flavoprotein (Fp)              | NM_023281    |
| 314 | Sdhb      | Succinate dehydrogenase complex, subunit B, iron sulfur (Ip)               | NM_023374    |
| 315 | Sdhc      | Succinate dehydrogenase complex, subunit C, integral membrane protein      | NM_025321    |
| 316 | Sdhd      | Succinate dehydrogenase complex, subunit D, integral membrane protein      | NM_025848    |
| 317 | Sec62     | SEC62 homolog (S. cerevisiae)                                              | NM_027016    |
| 318 | Sel1l     | Sel-1 suppressor of lin-12-like (C. elegans)                               | NM_001039089 |
| 319 | Serp1     | Stress-associated endoplasmic reticulum protein 1                          | NM_030685    |
| 320 | Serpina3k | Serine (or cysteine) peptidase inhibitor, clade A, member 3K               | NM_011458    |
| 321 | Serpina3n | Serine (or cysteine) peptidase inhibitor, clade A, member 3N               | NM_009252    |
| 322 | Slc10a1   | Solute carrier family 10 (sodium/bile acid cotransporter family), member 1 | NM_011387    |
| 323 | Slc2a3    | Solute carrier family 2 (facilitated glucose transporter), member 3        | NM_011401    |
| 324 | Slco1a4   | Solute carrier organic anion transporter family, member 1a4                | NM_030687    |
| 325 | Smpd1     | Sphingomyelin phosphodiesterase 1, acid lysosomal                          | NM_011421    |
| 326 | Sod1      | Superoxide dismutase 1, soluble                                            | NM_011434    |
| 327 | Spata2    | Spermatogenesis associated 2                                               | NM_170756    |
| 328 | Srebf1    | Sterol regulatory element binding transcription factor 1                   | NM_011480    |
| 329 | Stbd1     | Starch binding domain 1                                                    | NM_175096    |

|     |           |                                                                        |              |
|-----|-----------|------------------------------------------------------------------------|--------------|
| 330 | Sucla2    | Succinate-Coenzyme A ligase, ADP-forming, beta subunit                 | NM_011506    |
| 331 | Suclg1    | Succinate-CoA ligase, GDP-forming, alpha subunit                       | NM_019879    |
| 332 | Suclg2    | Succinate-Coenzyme A ligase, GDP-forming, beta subunit                 | NM_011507    |
| 333 | Sycp2     | Synaptonemal complex protein 2                                         | NM_177191    |
| 334 | Syt1      | Synaptotagmin I                                                        | NM_009306    |
| 335 | Syvn1     | Synovial apoptosis inhibitor 1, synoviolin                             | NM_028769    |
| 336 | Tagln     | Transgelin                                                             | NM_011526    |
| 337 | Tcp1      | T-complex protein 1                                                    | NM_013686    |
| 338 | Tff3      | Trefoil factor 3, intestinal                                           | NM_011575    |
| 339 | Tgfb1     | Transforming growth factor, beta 1                                     | NM_011577    |
| 340 | Tmem57    | Transmembrane protein 57                                               | NM_025382    |
| 341 | Tnf       | Tumor necrosis factor                                                  | NM_013693    |
| 342 | Tnfaip8l1 | Tumor necrosis factor, alpha-induced protein 8-like 1                  | NM_025566    |
| 343 | Tnfrsf10b | Tumor necrosis factor receptor superfamily, member 10b                 | NM_020275    |
| 344 | Tnfrsf1a  | Tumor necrosis factor receptor superfamily, member 1a                  | NM_011609    |
| 345 | Tnfsf10   | Tumor necrosis factor (ligand) superfamily, member 10                  | NM_009425    |
| 346 | Tpo       | Thyroid peroxidase                                                     | NM_009417    |
| 347 | Trim10    | Tripartite motif-containing 10                                         | NM_011280    |
| 348 | Trp53     | Transformation related protein 53                                      | NM_011640    |
| 349 | Txnip     | Thioredoxin interacting protein                                        | NM_023719    |
| 350 | Txnl4b    | Thioredoxin-like 4B                                                    | NM_175646    |
| 351 | Txnrd2    | Thioredoxin reductase 2                                                | NM_013711    |
| 352 | Ube2g2    | Ubiquitin-conjugating enzyme E2G 2                                     | NM_019803    |
| 353 | Ube2j2    | Ubiquitin-conjugating enzyme E2, J2 homolog (yeast)                    | NM_001039157 |
| 354 | Ubqln2    | Ubiquilin 2                                                            | NM_018798    |
| 355 | Ubxn4     | UBX domain protein 4                                                   | NM_026390    |
| 356 | Ucp1      | Uncoupling protein 1 (mitochondrial, proton carrier)                   | NM_009463    |
| 357 | Ucp2      | Uncoupling protein 2 (mitochondrial, proton carrier)                   | NM_011671    |
| 358 | Ucp3      | Uncoupling protein 3 (mitochondrial, proton carrier)                   | NM_009464    |
| 359 | Ugt1a1    | UDP glucuronosyltransferase 1 family, polypeptide A1                   | NM_201645    |
| 360 | Ugt2a1    | UDP glucuronosyltransferase 2 family, polypeptide A1                   | NM_053184    |
| 361 | Ugt2b1    | UDP glucuronosyltransferase 2 family, polypeptide B1                   | NM_152811    |
| 362 | Uox       | Urate oxidase                                                          | NM_009474    |
| 363 | Vcp       | Valosin containing protein                                             | NM_009503    |
| 364 | Wipi1     | WD repeat domain, phosphoinositide interacting 1                       | NM_145940    |
| 365 | Xbp1      | X-box binding protein 1                                                | NM_013842    |
| 366 | Xiap      | X-linked inhibitor of apoptosis                                        | NM_009688    |
| 367 | Xpa       | Xeroderma pigmentosum, complementation group A                         | NM_011728    |
| 368 | Xpc       | Xeroderma pigmentosum, complementation group C                         | NM_009531    |
| 369 | Xrcc1     | X-ray repair complementing defective repair in Chinese hamster cells 1 | NM_009532    |
| 370 | Xrcc5     | X-ray repair complementing defective repair in Chinese hamster cells 5 | NM_009533    |
